# Supplementary material for: Immune-mediated myogenesis and acetylcholine receptor clustering promote a slow disease progression in ALS mouse models
Source: PubMed Central journal article supplement (PMC9996869; doi:10.1186/s41232-023-00270-w), 2023-03-09

**Fig. 3**

b

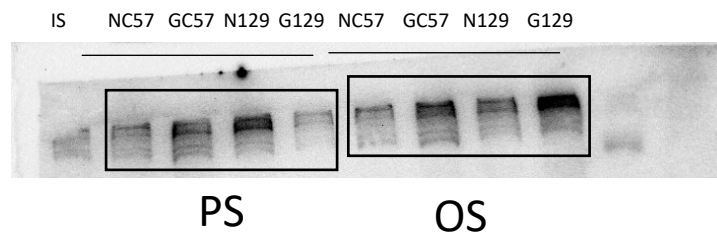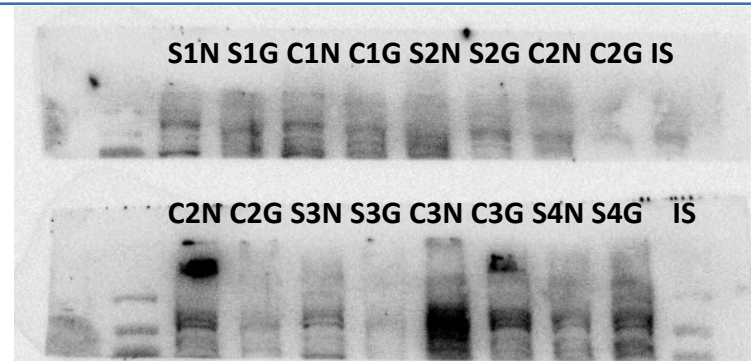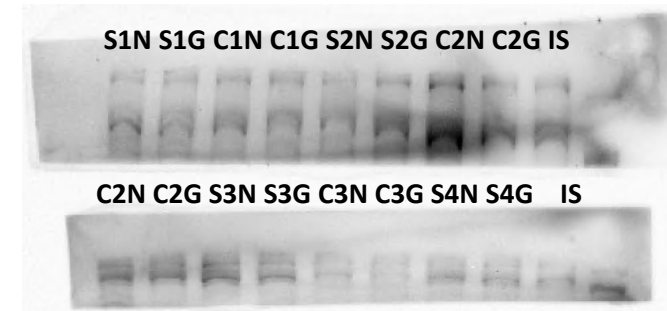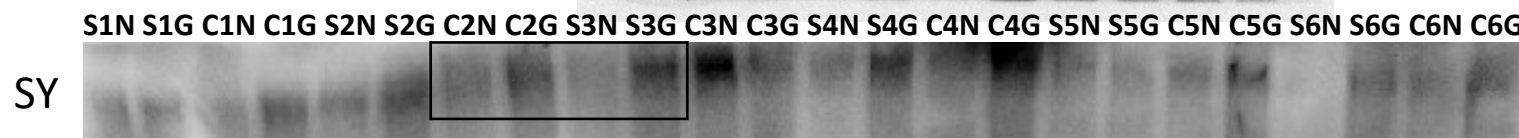

Agrin

c

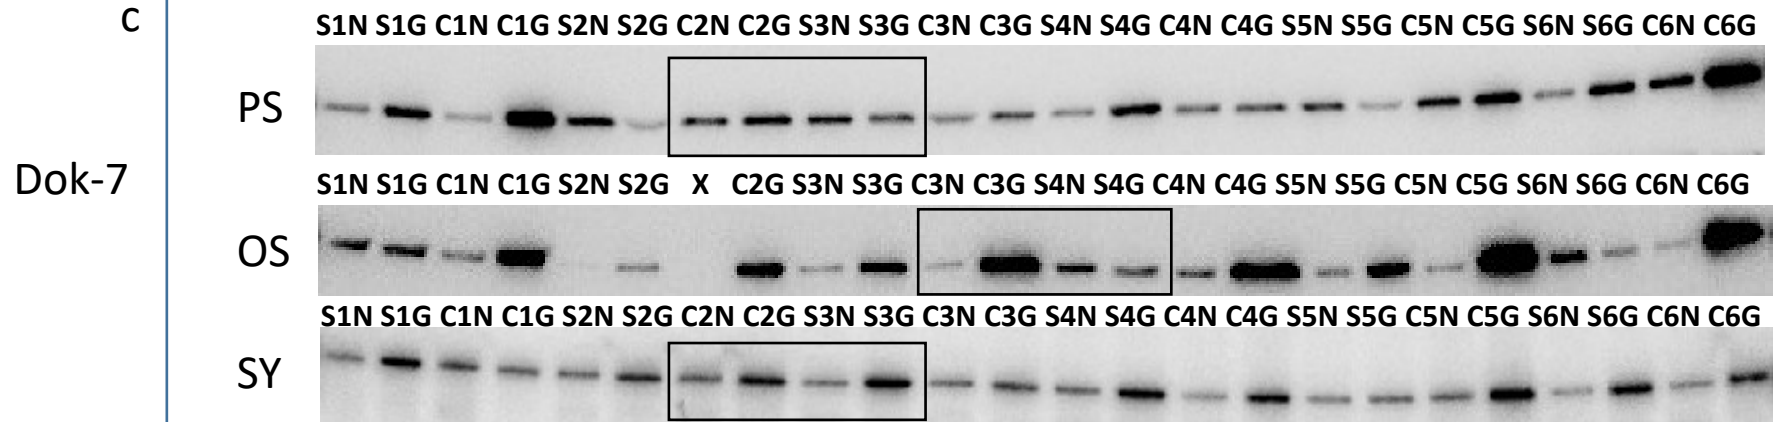

Dok-7

d

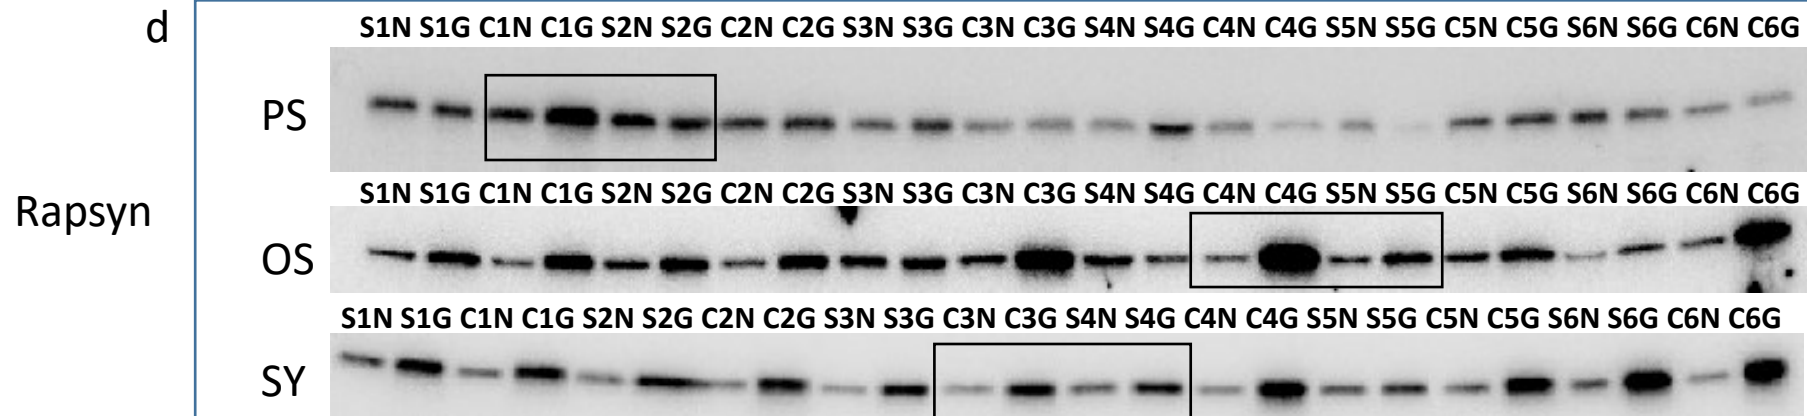

Rapsyn

**Fig. 5**

**b**

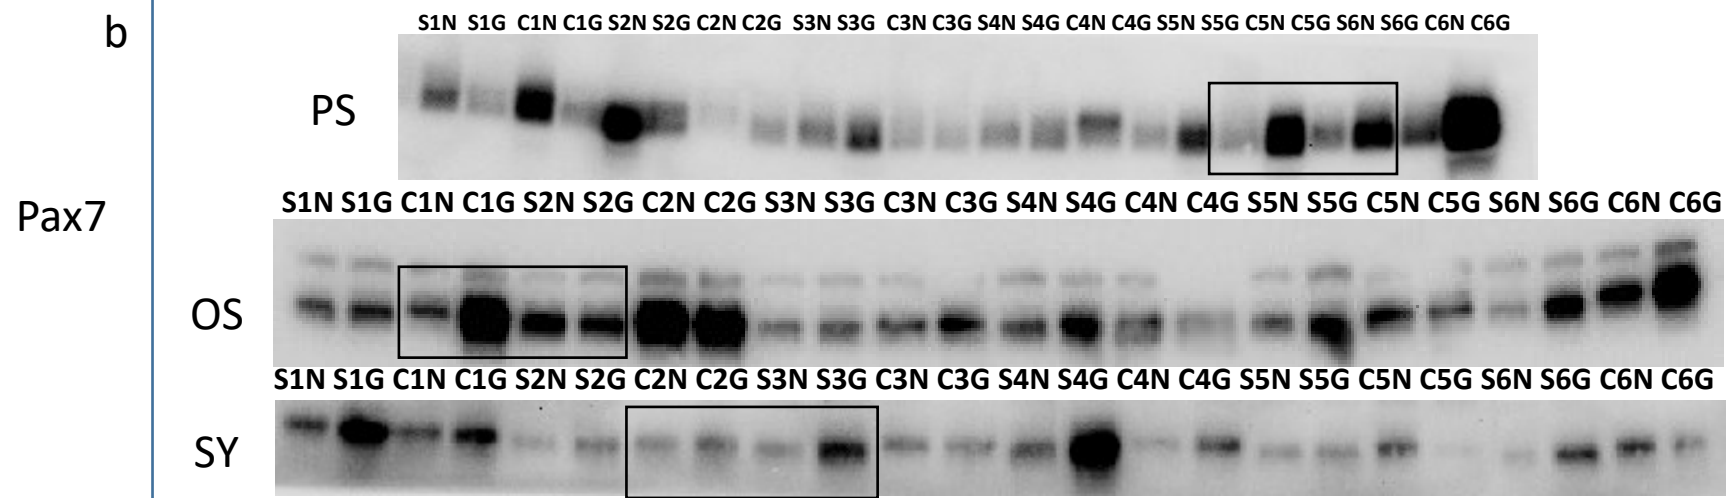

**c**

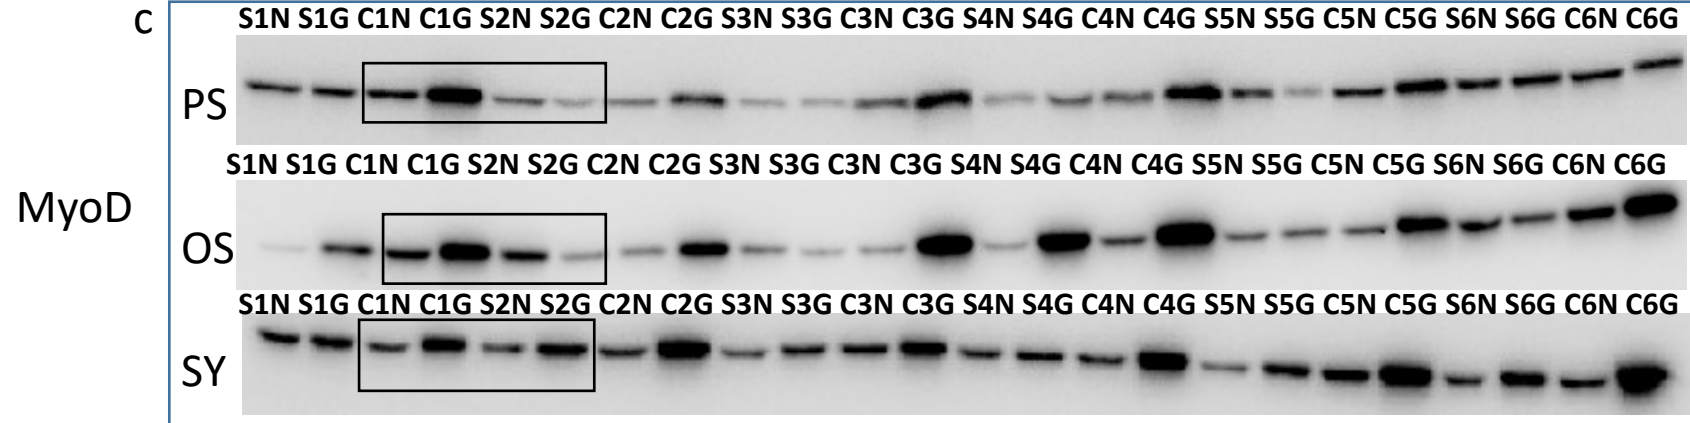

**d**

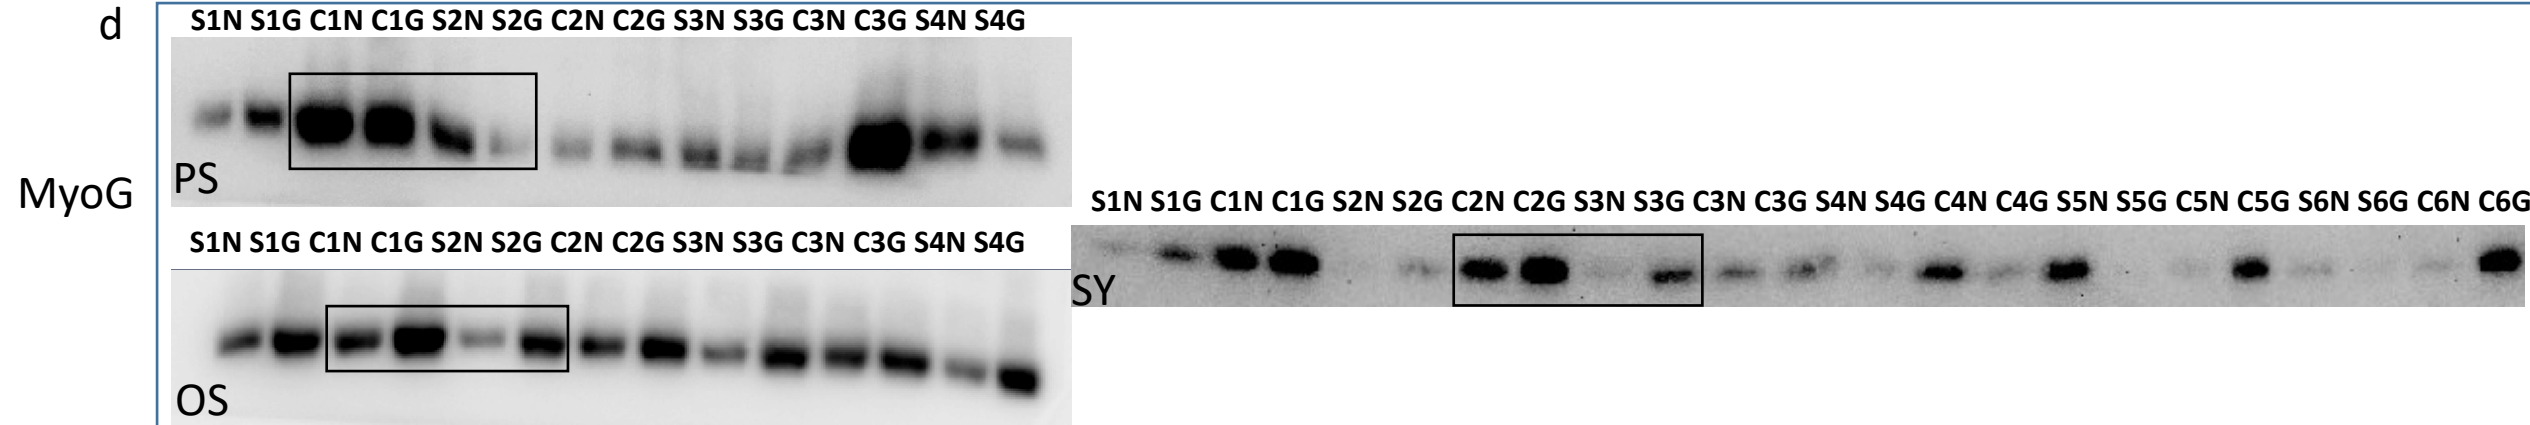

**Fig. 7**

**e**

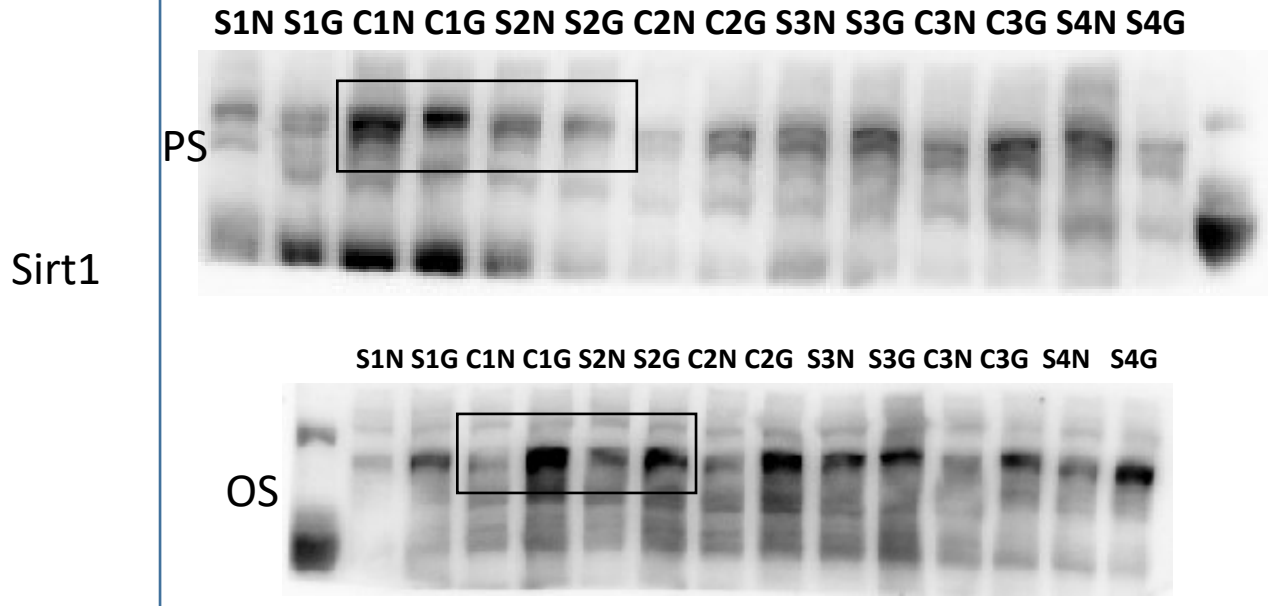

**f**

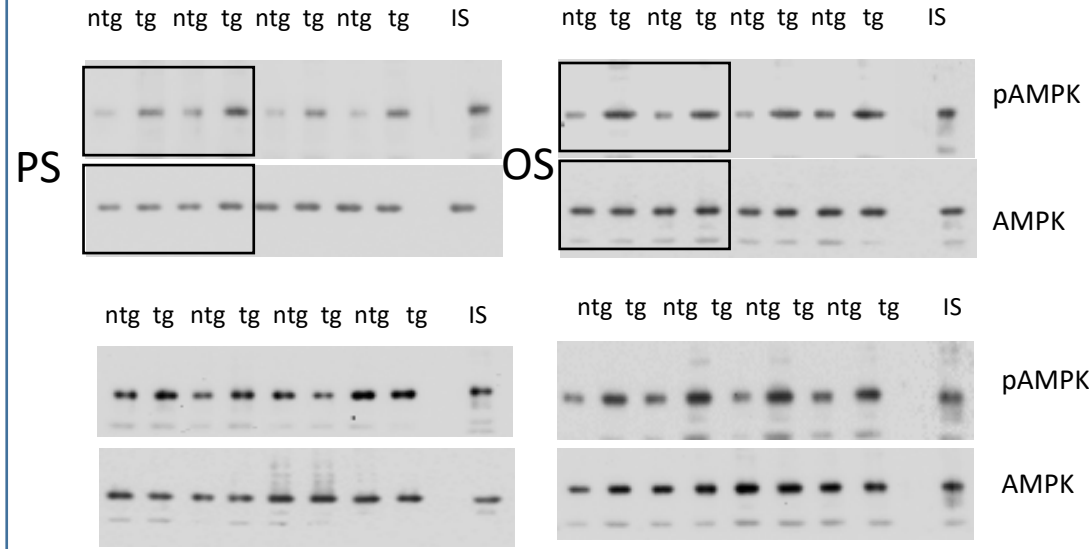

**g**

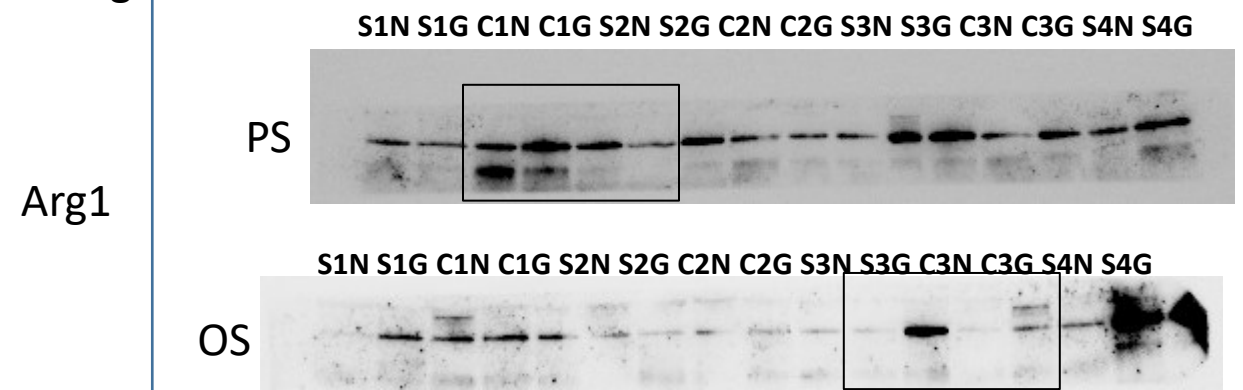

**Fig. 8**

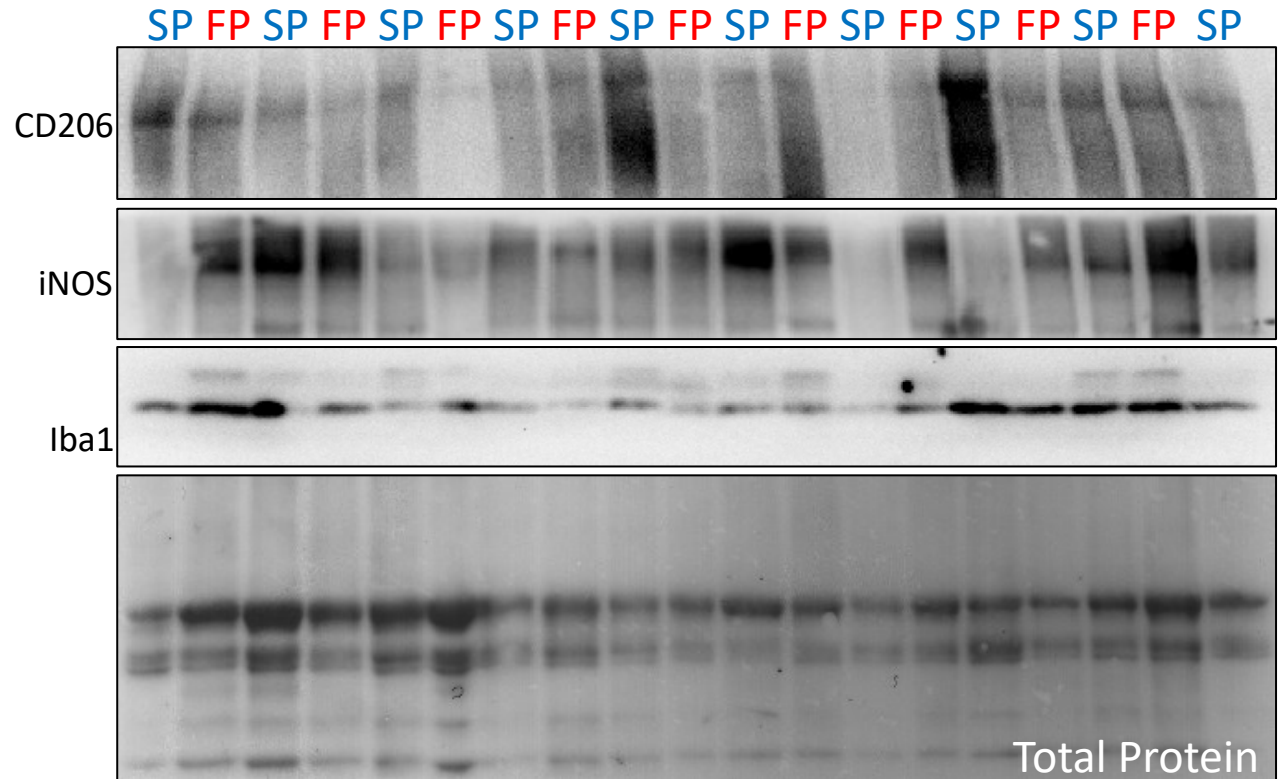

SP = SLOW PROGRESSING

FP = FAST PROGRESSING

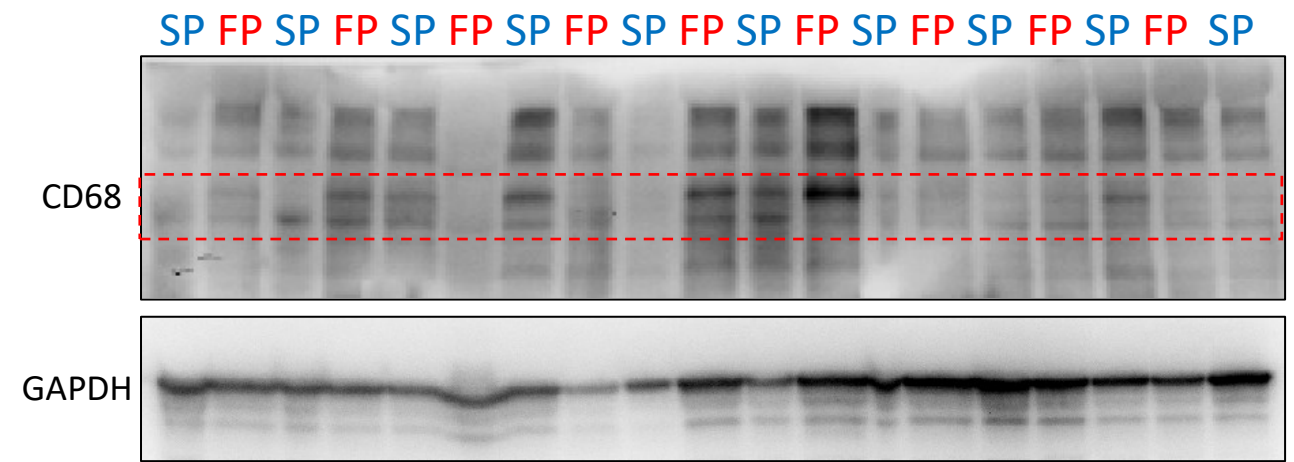

Supplement: 41232_2023_270_MOESM2_ESM.pdf [file 41232_2023_270_MOESM2_ESM.pdf]
